# Supplementary material for: Selection for Earlier Flowering Crop Associated with Climatic Variations in the Sahel
Source: PubMed Central journal article supplement (PMC3087796; doi:10.1371/journal.pone.0019563), 2011-05-04
Supplement: pone.0019563.s008.pdf [file pone.0019563.s008.pdf]

**Table S1****Passport data for varieties from the 2003 and 1976 samples**

For each variety, the town of origin, latitude, longitude, the year and the name of the variety are given.

| <b>Accession number</b> | <b>Town</b> | <b>Latitude</b> | <b>Longitude</b> | <b>Year of collection</b> | <b>Name of the variety</b> |
|-------------------------|-------------|-----------------|------------------|---------------------------|----------------------------|
| M371                    | Adoumchi    | 13.45N          | 10.14E           | 2003                      | Badendji                   |
| PE02599                 | Adoumchi    | 13.45N          | 10.14E           | 1976                      | Badendji                   |
| M212                    | Afala       | 15.10N          | 05.14E           | 2003                      | Ouianbijini                |
| M213                    | Afala       | 15.10N          | 05.14E           | 2003                      | Guerguéra                  |
| M214                    | Afala       | 15.10N          | 05.14E           | 2003                      | Baléri                     |
| M215                    | Afala       | 15.10N          | 05.14E           | 2003                      | Gassama                    |
| M216                    | Afala       | 15.10N          | 05.14E           | 2003                      | Bakin Iri                  |
| PE02744                 | Afala       | 15.10N          | 05.14E           | 1976                      | Guéro                      |
| M328                    | Ajékoria    | 14.26N          | 06.47E           | 2003                      | P3 Kollo                   |
| M329                    | Ajékoria    | 14.26N          | 06.47E           | 2003                      | Guerguéra                  |
| M330                    | Ajékoria    | 14.26N          | 06.47E           | 2003                      | Tarnekoua                  |
| M331                    | Ajékoria    | 14.26N          | 06.47E           | 2003                      | Ba Angouré                 |
| M332                    | Ajékoria    | 14.26N          | 06.47E           | 2003                      | Zongo                      |
| M333                    | Ajékoria    | 14.26N          | 06.47E           | 2003                      | Ouianbijini                |
| M334                    | Ajékoria    | 14.26N          | 06.47E           | 2003                      | Tarnekoua                  |
| PE02698                 | Ajékoria    | 14.26N          | 06.47E           | 1976                      | Zongo                      |
| PE02699                 | Ajékoria    | 14.26N          | 06.47E           | 1976                      | Ba Angouré                 |
| M250                    | Azarori     | 14.09N          | 05.55E           | 2003                      | Guerguéra                  |
| M251                    | Azarori     | 14.09N          | 05.55E           | 2003                      | Dan Boudouma               |
| M252                    | Azarori     | 14.09N          | 05.55E           | 2003                      | Ba Angouré                 |
| M253                    | Azarori     | 14.09N          | 05.55E           | 2003                      | Dabro                      |
| M254                    | Azarori     | 14.09N          | 05.55E           | 2003                      | HKP                        |
| M255                    | Azarori     | 14.09N          | 05.55E           | 2003                      | Matam Hatsi                |
| M256                    | Azarori     | 14.09N          | 05.55E           | 2003                      | Zatib                      |
| PE02803                 | Azarori     | 14.09N          | 05.55E           | 1976                      | Guerguéra                  |
| M269                    | Bagaroua    | 14.39N          | 04.20E           | 2003                      | Guerguéra                  |
| M270                    | Bagaroua    | 14.39N          | 04.20E           | 2003                      | Bakin Iri                  |
| M271                    | Bagaroua    | 14.39N          | 04.20E           | 2003                      | Dabki                      |
| M272                    | Bagaroua    | 14.39N          | 04.20E           | 2003                      | Bazaomé                    |
| M273                    | Bagaroua    | 14.39N          | 04.20E           | 2003                      | Eka                        |
| M274                    | Bagaroua    | 14.39N          | 04.20E           | 2003                      | Zongo                      |
| PE02758                 | Bagaroua    | 14.39N          | 04.20E           | 1976                      | Zongo                      |
| PE02759                 | Bagaroua    | 14.39N          | 04.20E           | 1976                      | Bakin Iri                  |
| PE02760                 | Bagaroua    | 14.39N          | 04.20E           | 1976                      | Guerguéra                  |
| PE02761                 | Bagaroua    | 14.39N          | 04.20E           | 1976                      | Bazaomé                    |
| M027                    | Baleyara    | 13.48N          | 02.57E           | 2003                      | Häini Kiré                 |

|         |           |        |        |      |                 |
|---------|-----------|--------|--------|------|-----------------|
| M028    | Baleyara  | 13.48N | 02.57E | 2003 | Tchoumo         |
| M029    | Baleyara  | 13.48N | 02.57E | 2003 | Zongo           |
| M030    | Baleyara  | 13.48N | 02.57E | 2003 | Haïni Kiré      |
| M031    | Baleyara  | 13.48N | 02.57E | 2003 | Foulanya        |
| M032    | Baleyara  | 13.48N | 02.57E | 2003 | M'Bounga        |
| PE02895 | Baleyara  | 13.48N | 02.57E | 1976 | Haïni Kiré      |
| PE02896 | Baleyara  | 13.48N | 02.57E | 1976 | Tchoumo         |
| PE02897 | Baleyara  | 13.48N | 02.57E | 1976 | Foulanya        |
| PE02898 | Baleyara  | 13.48N | 02.57E | 1976 | Somno Goberikoy |
| M018    | Bandio    | 13.54N | 01.05E | 2003 | Haïni Kiré      |
| M019    | Bandio    | 13.54N | 01.05E | 2003 | Somno           |
| M020    | Bandio    | 13.54N | 01.05E | 2003 | Kolala          |
| M021    | Bandio    | 13.54N | 01.05E | 2003 | Gnieye Koaré    |
| M022    | Bandio    | 13.54N | 01.05E | 2003 | Gnieye Kiré     |
| M023    | Bandio    | 13.54N | 01.05E | 2003 | Kourmé Haïni    |
| M024    | Bandio    | 13.54N | 01.05E | 2003 | Fiti-Fiti       |
| M025    | Bandio    | 13.54N | 01.05E | 2003 | Gnieye -Koba    |
| M026    | Bandio    | 13.54N | 01.05E | 2003 | Darankoba       |
| PE02955 | Bandio    | 13.54N | 01.05E | 1976 | Gnieye          |
| PE02956 | Bandio    | 13.54N | 01.05E | 1976 | Gnieye          |
| PE02957 | Bandio    | 13.54N | 01.05E | 1976 | Tchoumo         |
| PE02958 | Bandio    | 13.54N | 01.05E | 1976 | Kolala          |
| M065    | Banimaté  | 14.17N | 02.35E | 2003 | Somno           |
| M066    | Banimaté  | 14.17N | 02.35E | 2003 | Darankoba       |
| M067    | Banimaté  | 14.17N | 02.35E | 2003 | Tchoumo         |
| M068    | Banimaté  | 14.17N | 02.35E | 2003 | Haïni Kiré      |
| M069    | Banimaté  | 14.17N | 02.35E | 2003 | Gnieye          |
| PE02925 | Banimaté  | 14.17N | 02.35E | 1976 | Haïni Kiré      |
| PE02926 | Banimaté  | 14.17N | 02.35E | 1976 | Somno           |
| M007    | Bankilaré | 14.35N | 00.44E | 2003 | Bondabia        |
| M008    | Bankilaré | 14.35N | 00.44E | 2003 | Enélé Wanalis   |
| PE02969 | Bankilaré | 14.35N | 00.44E | 1976 | Haïni Kiré      |
| M077    | Barakan   | 14.11N | 01.49E | 2003 | Haïni Kiré      |
| M078    | Barakan   | 14.11N | 01.49E | 2003 | Darankoba       |
| M079    | Barakan   | 14.11N | 01.49E | 2003 | Dikabona        |
| M080    | Barakan   | 14.11N | 01.49E | 2003 | Tchoumo         |
| M081    | Barakan   | 14.11N | 01.49E | 2003 | Foulanya        |
| M082    | Barakan   | 14.11N | 01.49E | 2003 | Somno           |
| PE02934 | Barakan   | 14.11N | 01.49E | 1976 | Foulanya        |
| PE02935 | Barakan   | 14.11N | 01.49E | 1976 | Tchoumo         |
| PE02936 | Barakan   | 14.11N | 01.49E | 1976 | Ayoryzé         |

|         |                |        |        |      |                   |
|---------|----------------|--------|--------|------|-------------------|
| PE02937 | Barakan        | 14.11N | 01.49E | 1976 | Somno             |
| PE02938 | Barakan        | 14.11N | 01.49E | 1976 | Häini Kiré        |
| M094    | Bengou         | 11.54N | 03.33E | 2003 | Ouianbijini       |
| M095    | Bengou         | 11.54N | 03.33E | 2003 | Idon Hawäinia     |
| M096    | Bengou         | 11.54N | 03.33E | 2003 | Bakan Meawa       |
| M097    | Bengou         | 11.54N | 03.33E | 2003 | Dan Tondi         |
| M098    | Bengou         | 11.54N | 03.33E | 2003 | Zongo             |
| M099    | Bengou         | 11.54N | 03.33E | 2003 | Maïgachi          |
| PE02826 | Bengou         | 11.54N | 03.33E | 1976 | Zongo Ouianbijini |
| PE02827 | Bengou         | 11.54N | 03.33E | 1976 | Zongo             |
| PE02828 | Bengou         | 11.54N | 03.33E | 1976 | Maewa             |
| PE02829 | Bengou         | 11.54N | 03.33E | 1976 | Maewa Idoaouénia  |
| M352    | Bosso          | 13.42N | 13.19E | 2003 | Boudouma          |
| PE02584 | Bosso          | 13.42N | 13.19E | 1976 | Boudouma          |
| M355    | Boudoum        | 13.10N | 12.15E | 2003 | Boudouma          |
| M356    | Boudoum        | 13.10N | 12.15E | 2003 | Moro              |
| PE02588 | Boudoum        | 13.10N | 12.15E | 1976 | Moro              |
| M359    | Chéri          | 13.26N | 11.23E | 2003 | Fidéoua           |
| M360    | Chéri          | 13.26N | 11.23E | 2003 | Moro              |
| PE02604 | Chéri          | 13.26N | 11.23E | 1976 | Moro              |
| PE02605 | Chéri          | 13.26N | 11.23E | 1976 | Fidéoua           |
| M351    | Chétirami      | 13.11N | 12.25E | 2003 | Moro              |
| PE02586 | Chétirami      | 13.11N | 12.25E | 1976 | Moro              |
| M182    | Coquièzé Koara | 13.37N | 02.32E | 2003 | Somno Bi          |
| M183    | Coquièzé Koara | 13.37N | 02.32E | 2003 | Somno Seye        |
| M184    | Coquièzé Koara | 13.37N | 02.32E | 2003 | Somno Tchangara   |
| M185    | Coquièzé Koara | 13.37N | 02.32E | 2003 | CIVT              |
| M186    | Coquièzé Koara | 13.37N | 02.32E | 2003 | Tchoumo Bi        |
| M187    | Coquièzé Koara | 13.37N | 02.32E | 2003 | Darankoba         |
| M188    | Coquièzé Koara | 13.37N | 02.32E | 2003 | Tchoumo Koaré     |
| PE02891 | Coquièzé Koara | 13.37N | 02.32E | 1976 | Tchoumo           |
| PE02892 | Coquièzé Koara | 13.37N | 02.32E | 1976 | Somno             |
| PE02893 | Coquièzé Koara | 13.37N | 02.32E | 1976 | Maewa Darankoba   |
| PE02894 | Coquièzé Koara | 13.37N | 02.32E | 1976 | Häini Kiré Bouna  |
| M055    | Danbanguiro    | 14.47N | 03.19E | 2003 | Dan Téra          |
| M056    | Danbanguiro    | 14.47N | 03.19E | 2003 | Dan Hatsi         |
| M057    | Danbanguiro    | 14.47N | 03.19E | 2003 | Bakin Iri         |
| M058    | Danbanguiro    | 14.47N | 03.19E | 2003 | Zongo             |
| M059    | Danbanguiro    | 14.47N | 03.19E | 2003 | Bazaomé           |
| PE02921 | Danbanguiro    | 14.47N | 03.19E | 1976 | Bakin Iri         |
| PE02922 | Danbanguiro    | 14.47N | 03.19E | 1976 | Maewa Darankoba   |

|         |             |        |        |      |                  |
|---------|-------------|--------|--------|------|------------------|
| PE02923 | Danbanguiro | 14.47N | 03.19E | 1976 | Zongo            |
| PE02924 | Danbanguiro | 14.47N | 03.19E | 1976 | Bazaomé          |
| M378    | Dengas      | 13.03N | 09.20E | 2003 | Zongo            |
| M379    | Dengas      | 13.03N | 09.20E | 2003 | Massangari 1     |
| M380    | Dengas      | 13.03N | 09.20E | 2003 | Gamogi           |
| M381    | Dengas      | 13.03N | 09.20E | 2003 | Massangari 2     |
| M382    | Dengas      | 13.03N | 09.20E | 2003 | Massangari 3     |
| PE02640 | Dengas      | 13.03N | 09.20E | 1976 | Ba Angouré       |
| M237    | Déoulé      | 14.32N | 05.59E | 2003 | Guerguéra 1      |
| M238    | Déoulé      | 14.32N | 05.59E | 2003 | Guerguéra 2      |
| M239    | Déoulé      | 14.32N | 05.59E | 2003 | Kitsandamo       |
| M240    | Déoulé      | 14.32N | 05.59E | 2003 | Dan Dagali       |
| M241    | Déoulé      | 14.32N | 05.59E | 2003 | Bakin Hatsi      |
| M242    | Déoulé      | 14.32N | 05.59E | 2003 | Bakin Hatsi 2    |
| M243    | Déoulé      | 14.32N | 05.59E | 2003 | Zanfaroua        |
| PE02800 | Déoulé      | 14.32N | 05.59E | 1976 | Forforon Hatsi   |
| PE02801 | Déoulé      | 14.32N | 05.59E | 1976 | Guerguéra        |
| PE02802 | Déoulé      | 14.32N | 05.59E | 1976 | Gassama          |
| M389    | Dogo        | 13.30N | 09.01E | 2003 | Bakin Hatsi      |
| M390    | Dogo        | 13.30N | 09.01E | 2003 | Gamogi           |
| M391    | Dogo        | 13.30N | 09.01E | 2003 | P3 Kollo         |
| M392    | Dogo        | 13.30N | 09.01E | 2003 | Zongo            |
| M393    | Dogo        | 13.30N | 09.01E | 2003 | Tamangagi        |
| M394    | Dogo        | 13.30N | 09.01E | 2003 | Ankoutess        |
| M395    | Dogo        | 13.30N | 09.01E | 2003 | Ba Angouré       |
| PE02646 | Dogo        | 13.30N | 09.01E | 1976 | Tamangagi        |
| PE02647 | Dogo        | 13.30N | 09.01E | 1976 | Ba Angouré       |
| M113    | Dogon Kiria | 14.04N | 04.21E | 2003 | Jan Hatsi        |
| M114    | Dogon Kiria | 14.04N | 04.21E | 2003 | Zongo            |
| M115    | Dogon Kiria | 14.04N | 04.21E | 2003 | Bakin Iri        |
| M116    | Dogon Kiria | 14.04N | 04.21E | 2003 | Guerguéra        |
| M117    | Dogon Kiria | 14.04N | 04.21E | 2003 | Zongo            |
| M118    | Dogon Kiria | 14.04N | 04.21E | 2003 | Meawa            |
| PE02859 | Dogon Kiria | 14.04N | 04.21E | 1976 | Maewa Baki       |
| PE02860 | Dogon Kiria | 14.04N | 04.21E | 1976 | Maewa Ja         |
| PE02861 | Dogon Kiria | 14.04N | 04.21E | 1976 | Guerguéra        |
| PE02862 | Dogon Kiria | 14.04N | 04.21E | 1976 | Bakin Iri        |
| PE02863 | Dogon Kiria | 14.04N | 04.21E | 1976 | Dabki            |
| PE02864 | Dogon Kiria | 14.04N | 04.21E | 1976 | Zongo Outchabiri |
| M217    | Edir        | 14.50N | 04.46E | 2003 | Guerguéra 1      |
| M218    | Edir        | 14.50N | 04.46E | 2003 | Guerguéra 2      |

|         |             |        |        |      |                  |
|---------|-------------|--------|--------|------|------------------|
| M219    | Edir        | 14.50N | 04.46E | 2003 | Zongo            |
| M220    | Edir        | 14.50N | 04.46E | 2003 | Ouianbijini      |
| M221    | Edir        | 14.50N | 04.46E | 2003 | HKP              |
| M222    | Edir        | 14.50N | 04.46E | 2003 | Bakin Iri        |
| PE02754 | Edir        | 14.50N | 04.46E | 1976 | Zongo            |
| PE02755 | Edir        | 14.50N | 04.46E | 1976 | Guerguéra        |
| M083    | Eléwayene   | 14.58N | 00.48E | 2003 | Enélé Wazagarane |
| PE02943 | Eléwayene   | 14.58N | 00.48E | 1976 | Haïni Kiré       |
| M128    | Falwel      | 13.32N | 03.35E | 2003 | Zongo            |
| M129    | Falwel      | 13.32N | 03.35E | 2003 | Somno Gaoré      |
| M130    | Falwel      | 13.32N | 03.35E | 2003 | Eka              |
| M131    | Falwel      | 13.32N | 03.35E | 2003 | Somno Bi         |
| M132    | Falwel      | 13.32N | 03.35E | 2003 | Haïni Kiré       |
| PE02885 | Falwel      | 13.32N | 03.35E | 1976 | Somno Gaoré      |
| PE02886 | Falwel      | 13.32N | 03.35E | 1976 | Haïni Kiré       |
| PE02887 | Falwel      | 13.32N | 03.35E | 1976 | Somno Bi         |
| M404    | Gangara     | 14.38N | 08.30E | 2003 | Tamangagi        |
| M405    | Gangara     | 14.38N | 08.30E | 2003 | Ankoutess Filé   |
| M406    | Gangara     | 14.38N | 08.30E | 2003 | Ankoutess Béra   |
| M407    | Gangara     | 14.38N | 08.30E | 2003 | Ba Angouré       |
| PE02663 | Gangara     | 14.38N | 08.30E | 1976 | Ankoutess        |
| PE02664 | Gangara     | 14.38N | 08.30E | 1976 | Tamangagi        |
| PE02665 | Gangara     | 14.38N | 08.30E | 1976 | Filé             |
| PE02666 | Gangara     | 14.38N | 08.30E | 1976 | Ba Angouré       |
| M289    | Gazaoua     | 13.32N | 07.55E | 2003 | Zanfaroua        |
| M290    | Gazaoua     | 13.32N | 07.55E | 2003 | Zongo            |
| M291    | Gazaoua     | 13.32N | 07.55E | 2003 | Ankoutess        |
| M292    | Gazaoua     | 13.32N | 07.55E | 2003 | Ankoutess        |
| M293    | Gazaoua     | 13.32N | 07.55E | 2003 | Dan Moussa       |
| M294    | Gazaoua     | 13.32N | 07.55E | 2003 | P3 Kollo         |
| M295    | Gazaoua     | 13.32N | 07.55E | 2003 | Dan Eka          |
| M296    | Gazaoua     | 13.32N | 07.55E | 2003 | CIVT             |
| M297    | Gazaoua     | 13.32N | 07.55E | 2003 | HKP              |
| M298    | Gazaoua     | 13.32N | 07.55E | 2003 | Ouianbijini      |
| M299    | Gazaoua     | 13.32N | 07.55E | 2003 | Ankoutess        |
| M300    | Gazaoua     | 13.32N | 07.55E | 2003 | Dan Tiama        |
| M301    | Gazaoua     | 13.32N | 07.55E | 2003 | Dan Gombé        |
| M302    | Gazaoua     | 13.32N | 07.55E | 2003 | Bakan Maewa      |
| PE02717 | Gazaoua     | 13.32N | 07.55E | 1976 | Zongo            |
| M365    | Goudoumaria | 13.44N | 11.11E | 2003 | Fidéoua          |
| M366    | Goudoumaria | 13.44N | 11.11E | 2003 | Badendji+Gassia  |

|         |               |        |        |      |                   |
|---------|---------------|--------|--------|------|-------------------|
| PE02594 | Goudoumaria   | 13.44N | 11.11E | 1976 | Moro              |
| M408    | Guézawa       | 14.27N | 08.43E | 2003 | Ba Angouré        |
| M409    | Guézawa       | 14.27N | 08.43E | 2003 | Ankoutess         |
| M410    | Guézawa       | 14.27N | 08.43E | 2003 | Dan Eka           |
| M411    | Guézawa       | 14.27N | 08.43E | 2003 | Tamangagi         |
| PE02658 | Guézawa       | 14.27N | 08.43E | 1976 | Ba Angouré        |
| PE02659 | Guézawa       | 14.27N | 08.43E | 1976 | Ankoutess         |
| M372    | Guidiguir     | 13.40N | 09.51E | 2003 | Ba Angouré        |
| M373    | Guidiguir     | 13.40N | 09.51E | 2003 | Badendji          |
| M374    | Guidiguir     | 13.40N | 09.51E | 2003 | Koudous           |
| PE02629 | Guidiguir     | 13.40N | 09.51E | 1976 | Bodendji          |
| PE02630 | Guidiguir     | 13.40N | 09.51E | 1976 | Goudis            |
| M233    | Ibohamane     | 14.55N | 05.55E | 2003 | Dan Barnou        |
| M234    | Ibohamane     | 14.55N | 05.55E | 2003 | Zongo             |
| M235    | Ibohamane     | 14.55N | 05.55E | 2003 | Guerguéra         |
| M236    | Ibohamane     | 14.55N | 05.55E | 2003 | Ejeg              |
| PE02790 | Ibohamane     | 14.55N | 05.55E | 1976 | Guerguéra         |
| PE02791 | Ibohamane     | 14.55N | 05.55E | 1976 | Ejeg              |
| M263    | Jinguines     | 14.24N | 04.59E | 2003 | Meawa             |
| M264    | Jinguines     | 14.24N | 04.59E | 2003 | Bakin Iri         |
| M265    | Jinguines     | 14.24N | 04.59E | 2003 | Guéro             |
| M266    | Jinguines     | 14.24N | 04.59E | 2003 | Guerguéra         |
| M267    | Jinguines     | 14.24N | 04.59E | 2003 | Dogon Iri         |
| M268    | Jinguines     | 14.24N | 04.59E | 2003 | HKP               |
| PE02763 | Jinguines     | 14.24N | 04.59E | 1976 | Guéro             |
| PE02764 | Jinguines     | 14.24N | 04.59E | 1976 | Guerguéra         |
| PE02765 | Jinguines     | 14.24N | 04.59E | 1976 | Bakin Iri         |
| M312    | Kanan Bakaché | 13.52N | 07.50E | 2003 | Dan Tiama-Niger   |
| M313    | Kanan Bakaché | 13.52N | 07.50E | 2003 | Dan Tiama-Nigeria |
| M314    | Kanan Bakaché | 13.52N | 07.50E | 2003 | Ankoutess Hélé    |
| M315    | Kanan Bakaché | 13.52N | 07.50E | 2003 | Zongo             |
| M316    | Kanan Bakaché | 13.52N | 07.50E | 2003 | Dan Tiama 3       |
| M317    | Kanan Bakaché | 13.52N | 07.50E | 2003 | Ouianbijini       |
| M318    | Kanan Bakaché | 13.52N | 07.50E | 2003 | Zongo             |
| M319    | Kanan Bakaché | 13.52N | 07.50E | 2003 | Zanfaroua         |
| M320    | Kanan Bakaché | 13.52N | 07.50E | 2003 | Tamangagi 1       |
| M321    | Kanan Bakaché | 13.52N | 07.50E | 2003 | Tamangagi 2       |
| M322    | Kanan Bakaché | 13.52N | 07.50E | 2003 | Ba Angouré        |
| M323    | Kanan Bakaché | 13.52N | 07.50E | 2003 | Danguéguimi       |
| PE02709 | Kanan Bakaché | 13.52N | 07.50E | 1976 | Zongo             |
| PE02710 | Kanan Bakaché | 13.52N | 07.50E | 1976 | Dan Tiama         |

|         |                |        |        |      |                       |
|---------|----------------|--------|--------|------|-----------------------|
| PE02711 | Kanan Bakaché  | 13.52N | 07.50E | 1976 | Ankoutess             |
| M179    | Karma          | 13.41N | 01.49E | 2003 | Tchoumo               |
| M180    | Karma          | 13.41N | 01.49E | 2003 | Haïni Kiré            |
| M181    | Karma          | 13.41N | 01.49E | 2003 | Décigandey            |
| PE02949 | Karma          | 13.41N | 01.49E | 1976 | Haïni Kiré            |
| PE02950 | Karma          | 13.41N | 01.49E | 1976 | Maewa Darankoba       |
| PE02951 | Karma          | 13.41N | 01.49E | 1976 | Tchoumo               |
| PE02952 | Karma          | 13.41N | 01.49E | 1976 | Somno Koiré           |
| M244    | Karofane       | 14.19N | 06.08E | 2003 | Zongo 1               |
| M245    | Karofane       | 14.19N | 06.08E | 2003 | HKP                   |
| M246    | Karofane       | 14.19N | 06.08E | 2003 | Zongo 2               |
| M247    | Karofane       | 14.19N | 06.08E | 2003 | Guerguéa              |
| M248    | Karofane       | 14.19N | 06.08E | 2003 | Bakin Iri             |
| M249    | Karofane       | 14.19N | 06.08E | 2003 | Ba Angouré            |
| PE02797 | Karofane       | 14.19N | 06.08E | 1976 | Guerguéa              |
| PE02798 | Karofane       | 14.19N | 06.08E | 1976 | Ba Angouré            |
| PE02799 | Karofane       | 14.19N | 06.08E | 1976 | Zongo                 |
| M357    | Kélakam        | 13.34N | 11.45E | 2003 | Koudous               |
| M358    | Kélakam        | 13.34N | 11.45E | 2003 | Moro                  |
| PE02591 | Kélakam        | 13.34N | 11.45E | 1976 | Moro                  |
| PE02593 | Kélakam        | 13.34N | 11.45E | 1976 | Boudouma              |
| M108    | Kiessé         | 13.29N | 04.06E | 2003 | Zongo Kollo           |
| M109    | Kiessé         | 13.29N | 04.06E | 2003 | Guerguéa              |
| M110    | Kiessé         | 13.29N | 04.06E | 2003 | Bakin Iri             |
| M111    | Kiessé         | 13.29N | 04.06E | 2003 | Zongo                 |
| M112    | Kiessé         | 13.29N | 04.06E | 2003 | Bazaomé               |
| PE02847 | Kiessé         | 13.29N | 04.06E | 1976 | Zongo                 |
| PE02848 | Kiessé         | 13.29N | 04.06E | 1976 | Matam Hatsi           |
| PE02849 | Kiessé         | 13.29N | 04.06E | 1976 | Bakin Iri             |
| PE02850 | Kiessé         | 13.29N | 04.06E | 1976 | Bazaomé               |
| PE02851 | Kiessé         | 13.29N | 04.06E | 1976 | Maewa Bari            |
| PE02852 | Kiessé         | 13.29N | 04.06E | 1976 | Guerguéa              |
| M145    | Kikoudou Koara | 12.50N | 03.10E | 2003 | Somno Gaoré Seye      |
| M146    | Kikoudou Koara | 12.50N | 03.10E | 2003 | Somno Gaoré Tchangaré |
| M147    | Kikoudou Koara | 12.50N | 03.10E | 2003 | Somno Bi Koukou       |
| M148    | Kikoudou Koara | 12.50N | 03.10E | 2003 | Somno Gao Doungourio  |
| M149    | Kikoudou Koara | 12.50N | 03.10E | 2003 | Nihinnéno             |
| M150    | Kikoudou Koara | 12.50N | 03.10E | 2003 | Eka                   |
| M151    | Kikoudou Koara | 12.50N | 03.10E | 2003 | Haïni Kiré M'Bounga   |
| M152    | Kikoudou Koara | 12.50N | 03.10E | 2003 | Sambéra Izé           |
| M153    | Kikoudou Koara | 12.50N | 03.10E | 2003 | Somno Bi Warga        |

|         |                |        |        |      |                    |
|---------|----------------|--------|--------|------|--------------------|
| M154    | Kikoudou Koara | 12.50N | 03.10E | 2003 | Somno Gaoré Koukou |
| PE02888 | Kikoudou Koara | 12.50N | 03.10E | 1976 | Haïni Kiré Bounga  |
| PE02889 | Kikoudou Koara | 12.50N | 03.10E | 1976 | Somno              |
| M368    | Kilakina       | 13.43N | 10.43E | 2003 | Fidéoua            |
| M369    | Kilakina       | 13.43N | 10.43E | 2003 | Ba Angouré         |
| PE02597 | Kilakina       | 13.43N | 10.43E | 1976 | Ba Angouré         |
| M361    | Kojiméri       | 13.25N | 10.56E | 2003 | Boudouma           |
| M362    | Kojiméri       | 13.25N | 10.56E | 2003 | Badendji           |
| M363    | Kojiméri       | 13.25N | 10.56E | 2003 | Moro               |
| M364    | Kojiméri       | 13.25N | 10.56E | 2003 | Fidéoua            |
| PE02603 | Kojiméri       | 13.25N | 10.56E | 1976 | Moro               |
| M009    | Kokoro         | 14.12N | 00.55E | 2003 | Katta Haïni        |
| M010    | Kokoro         | 14.12N | 00.55E | 2003 | Bondabia           |
| M011    | Kokoro         | 14.12N | 00.55E | 2003 | Tchinguel          |
| M012    | Kokoro         | 14.12N | 00.55E | 2003 | Kolala             |
| PE02966 | Kokoro         | 14.12N | 00.55E | 1976 | Tchinguel          |
| PE02967 | Kokoro         | 14.12N | 00.55E | 1976 | Gnieye             |
| PE02968 | Kokoro         | 14.12N | 00.55E | 1976 | Kolala             |
| M230    | Koloma Baba    | 14.58N | 05.19E | 2003 | Gassama            |
| M231    | Koloma Baba    | 14.58N | 05.19E | 2003 | Guerguéra          |
| M232    | Koloma Baba    | 14.58N | 05.19E | 2003 | HKP                |
| PE02785 | Koloma Baba    | 14.58N | 05.19E | 1976 | Guerguéra          |
| PE02786 | Koloma Baba    | 14.58N | 05.19E | 1976 | Gassama            |
| M169    | Koné Béri      | 13.44N | 02.05E | 2003 | Tchoumo            |
| M170    | Koné Béri      | 13.44N | 02.05E | 2003 | Darankoba          |
| M171    | Koné Béri      | 13.44N | 02.05E | 2003 | Dikabona           |
| M172    | Koné Béri      | 13.44N | 02.05E | 2003 | Somno Koaré        |
| M173    | Koné Béri      | 13.44N | 02.05E | 2003 | Haïni Kiré         |
| PE02946 | Koné Béri      | 13.44N | 02.05E | 1976 | Maewa Darankoba    |
| PE02947 | Koné Béri      | 13.44N | 02.05E | 1976 | Tchoumo            |
| M335    | Kornaka        | 14.06N | 06.54E | 2003 | P3 Kollo           |
| M336    | Kornaka        | 14.06N | 06.54E | 2003 | HKP                |
| M337    | Kornaka        | 14.06N | 06.54E | 2003 | Zanfaroua          |
| M338    | Kornaka        | 14.06N | 06.54E | 2003 | Guerguéra          |
| M339    | Kornaka        | 14.06N | 06.54E | 2003 | Ouianbijini        |
| M340    | Kornaka        | 14.06N | 06.54E | 2003 | Zongo              |
| M341    | Kornaka        | 14.06N | 06.54E | 2003 | Ba Angouré         |
| PE02696 | Kornaka        | 14.06N | 06.54E | 1976 | Ba Angouré         |
| PE02697 | Kornaka        | 14.06N | 06.54E | 1976 | Zongo              |
| M324    | Korohane       | 14.34N | 06.34E | 2003 | Guerguéra          |
| M325    | Korohane       | 14.34N | 06.34E | 2003 | Ba Angouré         |



|         |            |        |        |      |                      |
|---------|------------|--------|--------|------|----------------------|
| M326    | Korohane   | 14.34N | 06.34E | 2003 | Tarnakoua            |
| M327    | Korohane   | 14.34N | 06.34E | 2003 | Matam Hatsi          |
| PE02795 | Korohane   | 14.34N | 06.34E | 1976 | Guerguéra            |
| PE02796 | Korohane   | 14.34N | 06.34E | 1976 | Ba Angouré           |
| M087    | Kotaki     | 12.27N | 02.54E | 2003 | Haïni Kiré Nassounga |
| M088    | Kotaki     | 12.27N | 02.54E | 2003 | Somno                |
| PE02820 | Kotaki     | 12.27N | 02.54E | 1976 | Haïni Kiré Nassounga |
| PE02821 | Kotaki     | 12.27N | 02.54E | 1976 | Haïni Kiré           |
| PE02822 | Kotaki     | 12.27N | 02.54E | 1976 | Somno                |
| M100    | Lido       | 12.54N | 03.44E | 2003 | Zongo                |
| M101    | Lido       | 12.54N | 03.44E | 2003 | Darankoba 1          |
| M102    | Lido       | 12.54N | 03.44E | 2003 | Bazaomé              |
| M103    | Lido       | 12.54N | 03.44E | 2003 | Dan Eka 1            |
| M104    | Lido       | 12.54N | 03.44E | 2003 | Jan Guéro            |
| M105    | Lido       | 12.54N | 03.44E | 2003 | Dan Eka 2            |
| M106    | Lido       | 12.54N | 03.44E | 2003 | Darankoba 2          |
| M107    | Lido       | 12.54N | 03.44E | 2003 | Bakan Meawa          |
| PE02836 | Lido       | 12.54N | 03.44E | 1976 | Guéro                |
| PE02837 | Lido       | 12.54N | 03.44E | 1976 | Maewa                |
| PE02838 | Lido       | 12.54N | 03.44E | 1976 | Darankoba            |
| PE02839 | Lido       | 12.54N | 03.44E | 1976 | Zongo                |
| PE02840 | Lido       | 12.54N | 03.44E | 1976 | Bazaomé              |
| M133    | Madalaïzé  | 13.13N | 03.47E | 2003 | Somno Gaoré          |
| M134    | Madalaïzé  | 13.13N | 03.47E | 2003 | Zongo                |
| M135    | Madalaïzé  | 13.13N | 03.47E | 2003 | Eka Maryo            |
| M136    | Madalaïzé  | 13.13N | 03.47E | 2003 | Somno Bi             |
| M137    | Madalaïzé  | 13.13N | 03.47E | 2003 | Eka Seyo             |
| M138    | Madalaïzé  | 13.13N | 03.47E | 2003 | Bazaomé              |
| M139    | Madalaïzé  | 13.13N | 03.47E | 2003 | Eka Warga            |
| PE02879 | Madalaïzé  | 13.13N | 03.47E | 1976 | Haïni Kiré           |
| PE02880 | Madalaïzé  | 13.13N | 03.47E | 1976 | Somno Bi             |
| PE02881 | Madalaïzé  | 13.13N | 03.47E | 1976 | Somno Koïré          |
| M275    | Madarounfa | 13.18N | 07.09E | 2003 | Dan Kazagui          |
| M276    | Madarounfa | 13.18N | 07.09E | 2003 | Ouianbijini          |
| M277    | Madarounfa | 13.18N | 07.09E | 2003 | Zongo                |
| M278    | Madarounfa | 13.18N | 07.09E | 2003 | Meawa                |
| M279    | Madarounfa | 13.18N | 07.09E | 2003 | Zanfaroua            |
| PE02683 | Madarounfa | 13.18N | 07.09E | 1976 | Zongo                |
| PE02684 | Madarounfa | 13.18N | 07.09E | 1976 | Zanfaroua            |
| PE02685 | Madarounfa | 13.18N | 07.09E | 1976 | Dan Kasaguey         |
| PE02686 | Madarounfa | 13.18N | 07.09E | 1976 | Dan Gambé            |

|         |             |        |        |      |                |
|---------|-------------|--------|--------|------|----------------|
| PE02687 | Madarounfa  | 13.18N | 07.09E | 1976 | Maewa          |
| M174    | Makalondi   | 12.50N | 01.42E | 2003 | Duyé           |
| M175    | Makalondi   | 12.50N | 01.42E | 2003 | Pagnimintay    |
| PE02981 | Makalondi   | 12.50N | 01.42E | 1976 | Somno          |
| M070    | Mangaïzé    | 14.42N | 01.58E | 2003 | Tchoumo        |
| M071    | Mangaïzé    | 14.42N | 01.58E | 2003 | Haïni Koaré    |
| M072    | Mangaïzé    | 14.42N | 01.58E | 2003 | Haïni Kiré     |
| M073    | Mangaïzé    | 14.42N | 01.58E | 2003 | Ayoryzé 1      |
| M074    | Mangaïzé    | 14.42N | 01.58E | 2003 | Koundasso      |
| M075    | Mangaïzé    | 14.42N | 01.58E | 2003 | Ayoryzé 2      |
| M076    | Mangaïzé    | 14.42N | 01.58E | 2003 | Darankoba      |
| PE02933 | Mangaïzé    | 14.42N | 01.58E | 1976 | Haïni Kiré     |
| M084    | Margou      | 13.06N | 02.52E | 2003 | Haïni Kiré     |
| M085    | Margou      | 13.06N | 02.52E | 2003 | Haïni Kiré     |
| M086    | Margou      | 13.06N | 02.52E | 2003 | Somno          |
| PE02816 | Margou      | 13.06N | 02.52E | 1976 | Haïni Kiré     |
| PE02817 | Margou      | 13.06N | 02.52E | 1976 | Somno          |
| M303    | May Guizawa | 14.10N | 08.15E | 2003 | Dan Zagaro     |
| M304    | May Guizawa | 14.10N | 08.15E | 2003 | Tarnakoua      |
| M305    | May Guizawa | 14.10N | 08.15E | 2003 | Dan Tiama      |
| M306    | May Guizawa | 14.10N | 08.15E | 2003 | Ankoutess      |
| M307    | May Guizawa | 14.10N | 08.15E | 2003 | Dan Kollo      |
| M308    | May Guizawa | 14.10N | 08.15E | 2003 | Zongo          |
| M309    | May Guizawa | 14.10N | 08.15E | 2003 | Ouianbijini    |
| M310    | May Guizawa | 14.10N | 08.15E | 2003 | Ankoutess Hélé |
| M311    | May Guizawa | 14.10N | 08.15E | 2003 | Ba Angouré     |
| PE02712 | May Guizawa | 14.10N | 08.15E | 1976 | Zongo          |
| PE02713 | May Guizawa | 14.10N | 08.15E | 1976 | Ankoutess      |
| M420    | May Jirgui  | 13.44N | 08.08E | 2003 | Zongo          |
| M421    | May Jirgui  | 13.44N | 08.08E | 2003 | Dan Tiama      |
| M422    | May Jirgui  | 13.44N | 08.08E | 2003 | Ankoutess      |
| M423    | May Jirgui  | 13.44N | 08.08E | 2003 | Dan Digali     |
| M424    | May Jirgui  | 13.44N | 08.08E | 2003 | Matam Hatsi    |
| PE02715 | May Jirgui  | 13.44N | 08.08E | 1976 | Zongo          |
| M396    | Miria       | 13.43N | 09.07E | 2003 | Ba Angouré     |
| M397    | Miria       | 13.43N | 09.07E | 2003 | Gamogi         |
| M398    | Miria       | 13.43N | 09.07E | 2003 | Ankoutess      |
| M399    | Miria       | 13.43N | 09.07E | 2003 | Dan Tiama      |
| PE02628 | Miria       | 13.43N | 09.07E | 1976 | Gamogi         |
| M203    | Mogueur     | 14.41N | 05.20E | 2003 | HKP            |
| M204    | Mogueur     | 14.41N | 05.20E | 2003 | Dan Boukoutou  |

|         |             |        |        |      |                 |
|---------|-------------|--------|--------|------|-----------------|
| M205    | Mogueur     | 14.41N | 05.20E | 2003 | Damagagari 1    |
| M206    | Mogueur     | 14.41N | 05.20E | 2003 | Damagagari 2    |
| M207    | Mogueur     | 14.41N | 05.20E | 2003 | Ouianbijini     |
| M208    | Mogueur     | 14.41N | 05.20E | 2003 | Guerguéra       |
| M209    | Mogueur     | 14.41N | 05.20E | 2003 | Zongo           |
| M210    | Mogueur     | 14.41N | 05.20E | 2003 | Bakin Iri       |
| M211    | Mogueur     | 14.41N | 05.20E | 2003 | Jan Guerguéra   |
| PE02783 | Mogueur     | 14.41N | 05.20E | 1976 | Guerguéra       |
| PE02784 | Mogueur     | 14.41N | 05.20E | 1976 | Dogon Iri       |
| M140    | Moko        | 13.11N | 03.16E | 2003 | Zongo           |
| M141    | Moko        | 13.11N | 03.16E | 2003 | Somno Gaoré     |
| M142    | Moko        | 13.11N | 03.16E | 2003 | Somno Bi        |
| M143    | Moko        | 13.11N | 03.16E | 2003 | Nihinnéno       |
| M144    | Moko        | 13.11N | 03.16E | 2003 | Haïni Kiré Zéna |
| PE02809 | Moko        | 13.11N | 03.16E | 1976 | Somno           |
| PE02810 | Moko        | 13.11N | 03.16E | 1976 | Haïni Kiré      |
| M353    | N'Galoua    | 13.25N | 12.47E | 2003 | Boudouma        |
| M354    | N'Galoua    | 13.25N | 12.47E | 2003 | Guissiri        |
| PE02582 | N'Galoua    | 13.25N | 12.47E | 1976 | Boudouma        |
| PE02583 | N'Galoua    | 13.25N | 12.47E | 1976 | Guissiri        |
| M375    | Ouacha      | 13.22N | 09.18E | 2003 | Dan Tiama       |
| M376    | Ouacha      | 13.22N | 09.18E | 2003 | Batou Kouché    |
| M377    | Ouacha      | 13.22N | 09.18E | 2003 | Gamogi          |
| PE02624 | Ouacha      | 13.22N | 09.18E | 1976 | Massangari      |
| PE02625 | Ouacha      | 13.22N | 09.18E | 1976 | Gamogi          |
| M342    | Rwafin Wada | 13.39N | 06.33E | 2003 | Matam Hatsi     |
| M343    | Rwafin Wada | 13.39N | 06.33E | 2003 | Dan Maewa       |
| M344    | Rwafin Wada | 13.39N | 06.33E | 2003 | Zongo           |
| M345    | Rwafin Wada | 13.39N | 06.33E | 2003 | Gwacki          |
| M346    | Rwafin Wada | 13.39N | 06.33E | 2003 | Damro           |
| M347    | Rwafin Wada | 13.39N | 06.33E | 2003 | Ba Angouré      |
| M348    | Rwafin Wada | 13.39N | 06.33E | 2003 | Ouianbijini     |
| M349    | Rwafin Wada | 13.39N | 06.33E | 2003 | Guerguéra       |
| M350    | Rwafin Wada | 13.39N | 06.33E | 2003 | Zanfaroua       |
| PE02722 | Rwafin Wada | 13.39N | 06.33E | 1976 | Zongo           |
| PE02723 | Rwafin Wada | 13.39N | 06.33E | 1976 | Matam Hatsi     |
| PE02724 | Rwafin Wada | 13.39N | 06.33E | 1976 | Maewa Fola      |
| PE02725 | Rwafin Wada | 13.39N | 06.33E | 1976 | Maewa Lambara   |
| M400    | Sabon Kafi  | 14.39N | 08.44E | 2003 | Ankoutess       |
| M401    | Sabon Kafi  | 14.39N | 08.44E | 2003 | Ankoutess       |
| M402    | Sabon Kafi  | 14.39N | 08.44E | 2003 | Ba Angouré      |

|         |              |        |        |      |                  |
|---------|--------------|--------|--------|------|------------------|
| M403    | Sabon Kafi   | 14.39N | 08.44E | 2003 | Ankoutess Hélé   |
| PE02660 | Sabon Kafi   | 14.39N | 08.44E | 1976 | Ankoutess        |
| PE02661 | Sabon Kafi   | 14.39N | 08.44E | 1976 | Ba Angouré       |
| M412    | Sabongari    | 13.59N | 08.59E | 2003 | Ba Angouré       |
| M412+   | Sabongari    | 13.59N | 08.59E | 2003 | Ba Angouré       |
| M413    | Sabongari    | 13.59N | 08.59E | 2003 | Tamangagi        |
| M414    | Sabongari    | 13.59N | 08.59E | 2003 | Ankoutess        |
| M415    | Sabongari    | 13.59N | 08.59E | 2003 | P3 Kollo         |
| PE02653 | Sabongari    | 13.59N | 08.59E | 1976 | Ba Angouré       |
| PE02654 | Sabongari    | 13.59N | 08.59E | 1976 | Goundou Goundou  |
| M037    | Sanam        | 14.52N | 03.55E | 2003 | Guerguéra        |
| M038    | Sanam        | 14.52N | 03.55E | 2003 | Dan Ayorou       |
| M039    | Sanam        | 14.52N | 03.55E | 2003 | Zongo            |
| M040    | Sanam        | 14.52N | 03.55E | 2003 | Bakin Iri        |
| M041    | Sanam        | 14.52N | 03.55E | 2003 | Bazaomé          |
| M042    | Sanam        | 14.52N | 03.55E | 2003 | Eka              |
| M043    | Sanam        | 14.52N | 03.55E | 2003 | Maewa            |
| PE02908 | Sanam        | 14.52N | 03.55E | 1976 | Zongo            |
| PE02909 | Sanam        | 14.52N | 03.55E | 1976 | Bazaomé          |
| PE02910 | Sanam        | 14.52N | 03.55E | 1976 | Guerguéra        |
| M176    | Saoura       | 13.20N | 01.30E | 2003 | Somno            |
| M177    | Saoura       | 13.20N | 01.30E | 2003 | Bondabi Haïni Bi |
| M178    | Saoura       | 13.20N | 01.30E | 2003 | Darankoba        |
| PE02979 | Saoura       | 13.20N | 01.30E | 1976 | Somno            |
| M370    | Sisya        | 13.54N | 10.24E | 2003 | Badendji         |
| PE02598 | Sisya        | 13.54N | 10.24E | 1976 | Bodendji         |
| M122    | Soukougoutan | 14.12N | 03.54E | 2003 | Bakin Iri        |
| M123    | Soukougoutan | 14.12N | 03.54E | 2003 | Guerguéra 1      |
| M124    | Soukougoutan | 14.12N | 03.54E | 2003 | Zongo            |
| M125    | Soukougoutan | 14.12N | 03.54E | 2003 | Bazaomé          |
| M126    | Soukougoutan | 14.12N | 03.54E | 2003 | Guerguéra 2      |
| M127    | Soukougoutan | 14.12N | 03.54E | 2003 | Maewa+Guerguéra  |
| PE02868 | Soukougoutan | 14.12N | 03.54E | 1976 | Zongo            |
| PE02869 | Soukougoutan | 14.12N | 03.54E | 1976 | Bakin Iri        |
| PE02870 | Soukougoutan | 14.12N | 03.54E | 1976 | Guerguéra        |
| PE02871 | Soukougoutan | 14.12N | 03.54E | 1976 | Maewa Baki       |
| PE02872 | Soukougoutan | 14.12N | 03.54E | 1976 | Bazaomé          |
| PE02873 | Soukougoutan | 14.12N | 03.54E | 1976 | Maewa Fara       |
| M223    | Tabalak      | 15.15N | 05.35E | 2003 | Ouitchiabiri     |
| M224    | Tabalak      | 15.15N | 05.35E | 2003 | Ouianbijini      |
| M225    | Tabalak      | 15.15N | 05.35E | 2003 | Guerguéra 1      |

|         |          |        |        |      |                     |
|---------|----------|--------|--------|------|---------------------|
| M226    | Tabalak  | 15.15N | 05.35E | 2003 | Guerguéra 2         |
| M227    | Tabalak  | 15.15N | 05.35E | 2003 | Zongo Zoungou       |
| M228    | Tabalak  | 15.15N | 05.35E | 2003 | Zongo               |
| M229    | Tabalak  | 15.15N | 05.35E | 2003 | Ankoutess           |
| PE02748 | Tabalak  | 15.15N | 05.35E | 1976 | Guerguéra           |
| M257    | Tajaé    | 14.13N | 05.16E | 2003 | Guerguéra           |
| M258    | Tajaé    | 14.13N | 05.16E | 2003 | Dabki               |
| M259    | Tajaé    | 14.13N | 05.16E | 2003 | Gassama             |
| M260    | Tajaé    | 14.13N | 05.16E | 2003 | Ouianbijini         |
| M261    | Tajaé    | 14.13N | 05.16E | 2003 | HKP                 |
| M262    | Tajaé    | 14.13N | 05.16E | 2003 | Zongo               |
| PE02779 | Tajaé    | 14.13N | 05.16E | 1976 | Zongo               |
| PE02780 | Tajaé    | 14.13N | 05.16E | 1976 | Guerguéra           |
| M014    | Taka     | 13.46N | 00.48E | 2003 | Gnieye              |
| M015    | Taka     | 13.46N | 00.48E | 2003 | Hâini Kiré          |
| M016    | Taka     | 13.46N | 00.48E | 2003 | Kolala              |
| M017    | Taka     | 13.46N | 00.48E | 2003 | Tchinguel           |
| PE02962 | Taka     | 13.46N | 00.48E | 1976 | Tchinguel           |
| PE02963 | Taka     | 13.46N | 00.48E | 1976 | Foulanya            |
| PE02964 | Taka     | 13.46N | 00.48E | 1976 | Gnieye              |
| PE02965 | Taka     | 13.46N | 00.48E | 1976 | Somno               |
| M159    | Tamou    | 12.45N | 02.10E | 2003 | Meawa Zodi          |
| M160    | Tamou    | 12.45N | 02.10E | 2003 | Gommoni             |
| M161    | Tamou    | 12.45N | 02.10E | 2003 | Bakin Guéro         |
| M162    | Tamou    | 12.45N | 02.10E | 2003 | Zongo               |
| M163    | Tamou    | 12.45N | 02.10E | 2003 | Mardjoua            |
| M164    | Tamou    | 12.45N | 02.10E | 2003 | Ali Cheibou         |
| M165    | Tamou    | 12.45N | 02.10E | 2003 | Sarakoua Sounsou    |
| M166    | Tamou    | 12.45N | 02.10E | 2003 | Darankoba           |
| M167    | Tamou    | 12.45N | 02.10E | 2003 | Jan Guéro           |
| M168    | Tamou    | 12.45N | 02.10E | 2003 | Bossari             |
| PE02983 | Tamou    | 12.45N | 02.10E | 1976 | Somno Koïré         |
| PE02984 | Tamou    | 12.45N | 02.10E | 1976 | Hâini Kiré          |
| M280    | Tchadoua | 13.33N | 07.27E | 2003 | Zanfaroua           |
| M281    | Tchadoua | 13.33N | 07.27E | 2003 | Meawa               |
| M282    | Tchadoua | 13.33N | 07.27E | 2003 | HKP                 |
| M283    | Tchadoua | 13.33N | 07.27E | 2003 | P3 Kollo            |
| M284    | Tchadoua | 13.33N | 07.27E | 2003 | Zongo               |
| M285    | Tchadoua | 13.33N | 07.27E | 2003 | Dan Kouroungoussaou |
| M286    | Tchadoua | 13.33N | 07.27E | 2003 | CIVT                |
| M287    | Tchadoua | 13.33N | 07.27E | 2003 | Ouianbijini         |

|         |                  |        |        |      |                   |
|---------|------------------|--------|--------|------|-------------------|
| M288    | Tchadoua         | 13.33N | 07.27E | 2003 | Ankoutess         |
| PE02718 | Tchadoua         | 13.33N | 07.27E | 1976 | Zongo             |
| M044    | Tchi-m-Berkaouan | 15.12N | 03.32E | 2003 | Bazaomé           |
| M045    | Tchi-m-Berkaouan | 15.12N | 03.32E | 2003 | Guerguéra         |
| M046    | Tchi-m-Berkaouan | 15.12N | 03.32E | 2003 | Matam Hatsi       |
| M047    | Tchi-m-Berkaouan | 15.12N | 03.32E | 2003 | Eka               |
| M048    | Tchi-m-Berkaouan | 15.12N | 03.32E | 2003 | Ouitchiabiri      |
| M049    | Tchi-m-Berkaouan | 15.12N | 03.32E | 2003 | Dan Markoye       |
| M050    | Tchi-m-Berkaouan | 15.12N | 03.32E | 2003 | Kitsandamo        |
| M051    | Tchi-m-Berkaouan | 15.12N | 03.32E | 2003 | Bakin Iri         |
| M052    | Tchi-m-Berkaouan | 15.12N | 03.32E | 2003 | Zongo 1           |
| M053    | Tchi-m-Berkaouan | 15.12N | 03.32E | 2003 | Dan Ayorou        |
| M054    | Tchi-m-Berkaouan | 15.12N | 03.32E | 2003 | Zongo 2           |
| PE02915 | Tchi-m-Berkaouan | 15.12N | 03.32E | 1976 | Zongo             |
| PE02916 | Tchi-m-Berkaouan | 15.12N | 03.32E | 1976 | Bakin Iri         |
| PE02917 | Tchi-m-Berkaouan | 15.12N | 03.32E | 1976 | Bazaomé           |
| PE02918 | Tchi-m-Berkaouan | 15.12N | 03.32E | 1976 | Maewa             |
| M155    | Tchoudawa        | 13.20N | 02.34E | 2003 | Tchoumo           |
| M156    | Tchoudawa        | 13.20N | 02.34E | 2003 | Haïni Kiré Koukou |
| M157    | Tchoudawa        | 13.20N | 02.34E | 2003 | Somno Darankoba   |
| M158    | Tchoudawa        | 13.20N | 02.34E | 2003 | Somno Bi          |
| PE02985 | Tchoudawa        | 13.20N | 02.34E | 1976 | Haïni Kiré        |
| PE02986 | Tchoudawa        | 13.20N | 02.34E | 1976 | Somno             |
| M089    | Tenda            | 11.59N | 03.19E | 2003 | Haïni Kiré Koukou |
| M090    | Tenda            | 11.59N | 03.19E | 2003 | Foulan Sory       |
| M091    | Tenda            | 11.59N | 03.19E | 2003 | Somno Bi          |
| M092    | Tenda            | 11.59N | 03.19E | 2003 | Haïni Kiré Gazéra |
| M093    | Tenda            | 11.59N | 03.19E | 2003 | Fono Laké         |
| PE02825 | Tenda            | 11.59N | 03.19E | 1976 | Haïni Kiré        |
| M416    | Tirmini          | 13.47N | 08.48E | 2003 | Dan Eka           |
| M417    | Tirmini          | 13.47N | 08.48E | 2003 | Ba Angouré        |
| M418    | Tirmini          | 13.47N | 08.48E | 2003 | Dan Tiama         |
| M419    | Tirmini          | 13.47N | 08.48E | 2003 | Tamangagi         |
| PE02609 | Tirmini          | 13.47N | 08.48E | 1976 | Tamangagi         |
| PE02610 | Tirmini          | 13.47N | 08.48E | 1976 | Ba Angouré        |
| M033    | Tounfalis        | 14.19N | 03.17E | 2003 | Dan Ayorou        |
| M034    | Tounfalis        | 14.19N | 03.17E | 2003 | Bazaomé           |
| M035    | Tounfalis        | 14.19N | 03.17E | 2003 | Matam Hatsi       |
| M036    | Tounfalis        | 14.19N | 03.17E | 2003 | Zongo             |
| M060    | Tounfalis        | 14.19N | 03.17E | 2003 | Guerguéra         |
| M061    | Tounfalis        | 14.19N | 03.17E | 2003 | Matam Hatsi       |

|         |               |        |        |      |                      |
|---------|---------------|--------|--------|------|----------------------|
| M062    | Tounfalis     | 14.19N | 03.17E | 2003 | Dankoutouboul        |
| M063    | Tounfalis     | 14.19N | 03.17E | 2003 | Bakin Iri            |
| M064    | Tounfalis     | 14.19N | 03.17E | 2003 | Eka                  |
| PE02901 | Tounfalis     | 14.19N | 03.17E | 1976 | Dan Ayorou           |
| PE02902 | Tounfalis     | 14.19N | 03.17E | 1976 | Zongo                |
| PE02903 | Tounfalis     | 14.19N | 03.17E | 1976 | Bazaomé              |
| M383    | Tsatsoumbroum | 12.07N | 08.29E | 2003 | Zongo 1              |
| M384    | Tsatsoumbroum | 12.07N | 08.29E | 2003 | Zongo 2              |
| M385    | Tsatsoumbroum | 12.07N | 08.29E | 2003 | Dan Barnou           |
| M386    | Tsatsoumbroum | 12.07N | 08.29E | 2003 | Maewa                |
| M387    | Tsatsoumbroum | 12.07N | 08.29E | 2003 | Ankoutess            |
| M388    | Tsatsoumbroum | 12.07N | 08.29E | 2003 | Matam Hatsi          |
| PE02615 | Tsatsoumbroum | 12.07N | 08.29E | 1976 | Zongo                |
| PE02616 | Tsatsoumbroum | 12.07N | 08.29E | 1976 | Dan Barnou           |
| PE02617 | Tsatsoumbroum | 12.07N | 08.29E | 1976 | Ankoutess            |
| M195    | Tsernawa      | 13.54N | 05.21E | 2003 | Bakin Iri            |
| M196    | Tsernawa      | 13.54N | 05.21E | 2003 | Gassama              |
| M197    | Tsernawa      | 13.54N | 05.21E | 2003 | Zongo Takeï          |
| M198    | Tsernawa      | 13.54N | 05.21E | 2003 | Zongo Ouianbijini    |
| M199    | Tsernawa      | 13.54N | 05.21E | 2003 | Guerguéra Kitsandamo |
| M200    | Tsernawa      | 13.54N | 05.21E | 2003 | Matam Hatsi          |
| M201    | Tsernawa      | 13.54N | 05.21E | 2003 | HKP                  |
| M202    | Tsernawa      | 13.54N | 05.21E | 2003 | Zongo Dabki          |
| PE02776 | Tsernawa      | 13.54N | 05.21E | 1976 | Zongo Outchabiri     |
| PE02777 | Tsernawa      | 13.54N | 05.21E | 1976 | Guerguéra            |
| M001    | Wanzerbé      | 14.45N | 00.23E | 2003 | Bondabia             |
| M002    | Wanzerbé      | 14.45N | 00.23E | 2003 | Tchinguel            |
| M003    | Wanzerbé      | 14.45N | 00.23E | 2003 | Kolala               |
| M004    | Wanzerbé      | 14.45N | 00.23E | 2003 | Somno                |
| M005    | Wanzerbé      | 14.45N | 00.23E | 2003 | Foulanya             |
| M006    | Wanzerbé      | 14.45N | 00.23E | 2003 | Gandassan            |
| PE02970 | Wanzerbé      | 14.45N | 00.23E | 1976 | Foulanya             |
| PE02971 | Wanzerbé      | 14.45N | 00.23E | 1976 | Kolala               |
| PE02972 | Wanzerbé      | 14.45N | 00.23E | 1976 | Haïni Kiré           |
| PE02973 | Wanzerbé      | 14.45N | 00.23E | 1976 | Gnieye               |
| M189    | Yaya          | 13.51N | 04.44E | 2003 | Zongo                |
| M190    | Yaya          | 13.51N | 04.44E | 2003 | Bazaomé              |
| M191    | Yaya          | 13.51N | 04.44E | 2003 | Jan Maewa            |
| M192    | Yaya          | 13.51N | 04.44E | 2003 | Bakan Meawa          |
| M193    | Yaya          | 13.51N | 04.44E | 2003 | Guerguéra            |
| M194    | Yaya          | 13.51N | 04.44E | 2003 | Zongo Kollo          |

|         |      |        |        |      |       |
|---------|------|--------|--------|------|-------|
| PE02772 | Yaya | 13.51N | 04.44E | 1976 | Guéro |
| PE02773 | Yaya | 13.51N | 04.44E | 1976 | Maewa |

---
