# Supplementary material for: Selection for Earlier Flowering Crop Associated with Climatic Variations in the Sahel
Source: PubMed Central journal article supplement (PMC3087796; doi:10.1371/journal.pone.0019563), 2011-05-04
Supplement: pone.0019563.s009.pdf [file pone.0019563.s009.pdf]

**Table S2****Paired varieties from the 2003 and 1976 samples**

Varieties were paired based on shared names and for some varieties by direct observation in the field.

| <b>Accession 2003</b> | <b>Accession 1976</b> | <b>Variety</b> | <b>Town</b>    |
|-----------------------|-----------------------|----------------|----------------|
| M371                  | PE02599               | Badendji       | Adoumchi       |
| M332                  | PE02698               | Zongo          | Ajékoria       |
| M331                  | PE02699               | Ba Angouré     | Ajékoria       |
| M250                  | PE02803               | Guerguéra      | Azarori        |
| M270                  | PE02759               | Bakin Iri      | Bagaroua       |
| M269                  | PE02760               | Guerguéra      | Bagaroua       |
| M272                  | PE02761               | Bazaoné        | Bagaroua       |
| M274                  | PE02758               | Zongo          | Bagaroua       |
| M028                  | PE02896               | Tchoumo        | Baleyara       |
| M031                  | PE02897               | Foulanya       | Baleyara       |
| M027                  | PE02895               | Haïni Kiré     | Baleyara       |
| M020                  | PE02958               | Kolala         | Bangio         |
| M021                  | PE02955               | Gnieye         | Bangio         |
| M022                  | PE02956               | Gnieye         | Bangio         |
| M065                  | PE02926               | Somno          | Banimaté       |
| M068                  | PE02925               | Haïni Kiré     | Banimaté       |
| M080                  | PE02935               | Tchoumo        | Barakan        |
| M082                  | PE02937               | Somno          | Barakan        |
| M077                  | PE02938               | Haïni Kiré     | Barakan        |
| M098                  | PE02827               | Zongo          | Bengou         |
| M094                  | PE02826               | Ouianbijini    | Bengou         |
| M096                  | PE02828               | Maewa          | Bengou         |
| M352                  | PE02584               | Boudouma       | Bosso          |
| M356                  | PE02588               | Moro           | Boudoum        |
| M359                  | PE02605               | Fidéoua        | Chéri          |
| M360                  | PE02604               | Moro           | Chéri          |
| M351                  | PE02586               | Moro           | Chétimari      |
| M051                  | PE02916               | Bakin Iri      | Chimbarkaouan  |
| M044                  | PE02917               | Bazaomé        | Chimbarkaouan  |
| M052                  | PE02915               | Zongo          | Chimbarkaouan  |
| M186                  | PE02891               | Tchoumo        | Coquièzé Koara |
| M183                  | PE02892               | Somno          | Coquièzé Koara |
| M057                  | PE02921               | Bakin Iri      | Danbanguiro    |
| M058                  | PE02923               | Zongo          | Danbanguiro    |
| M059                  | PE02924               | Bazaoné        | Danbanguiro    |
| M238                  | PE02801               | Guerguéra      | Déoulé         |

|      |         |                   |                |
|------|---------|-------------------|----------------|
| M265 | PE02763 | Guéro             | Djinguiniss    |
| M266 | PE02764 | Guerguéra         | Djinguiniss    |
| M264 | PE02765 | Bakin Iri         | Djinguiniss    |
| M393 | PE02646 | Tamangagi         | Dogo           |
| M395 | PE02647 | Ba Angouré        | Dogo           |
| M116 | PE02861 | Guerguéra         | Dogo Kiria     |
| M115 | PE02862 | Bakin Iri         | Dogo Kiria     |
| M118 | PE02859 | Maiwa Baki        | Dogo Kiria     |
| M219 | PE02754 | Zongo             | Edir           |
| M218 | PE02755 | Guerguéra         | Edir           |
| M129 | PE02885 | Somno Gaoré       | Falwel         |
| M131 | PE02887 | Somno Bi          | Falwel         |
| M132 | PE02886 | Haïni Kiré        | Falwel         |
| M404 | PE02664 | Tamangagi         | Gangara        |
| M406 | PE02663 | Ankoutess         | Gangara        |
| M407 | PE02666 | Ba Angouré        | Gangara        |
| M290 | PE02717 | Zongo             | Gazaoua        |
| M408 | PE02658 | Ba Angouré        | Guézawa        |
| M409 | PE02659 | Ankoutess         | Guézawa        |
| M373 | PE02629 | Badendji          | Guidiguir      |
| M235 | PE02790 | Guerguéra         | Ibohamane      |
| M236 | PE02791 | Ejeg              | Ibohamane      |
| M312 | PE02710 | Dan Tiama         | Kanan Bakaché  |
| M314 | PE02711 | Ankoutess         | Kanan Bakaché  |
| M315 | PE02709 | Zongo             | Kanan Bakaché  |
| M179 | PE02951 | Tchoumo           | Karma          |
| M180 | PE02949 | Haïni Kiré        | Karma          |
| M358 | PE02591 | Moro              | Kélakam        |
| M111 | PE02847 | Zongo             | Kieché         |
| M110 | PE02849 | Bakin Iri         | Kieché         |
| M112 | PE02850 | Bazaoné           | Kieché         |
| M109 | PE02852 | Guerguéra         | Kieché         |
| M151 | PE02888 | Haïni Kiré Bounga | Kikoudou Koara |
| M154 | PE02889 | Somno             | Kikoudou Koara |
| M369 | PE02597 | Ba Angouré        | Kilakinna      |
| M363 | PE02603 | Moro              | Kojiméri       |
| M012 | PE02968 | Kolala            | Kokoro         |
| M011 | PE02966 | Tchinguel         | Kokoro         |
| M230 | PE02786 | Gassama           | Koloma Baba    |
| M231 | PE02785 | Guerguéra         | Koloma Baba    |
| M169 | PE02947 | Tchoumo           | Koné Béry      |

|       |         |              |                |
|-------|---------|--------------|----------------|
| M340  | PE02697 | Zongo        | Kornaka        |
| M341  | PE02696 | Ba Angouré   | Kornaka        |
| M247  | PE02797 | Guerguéra    | Korofane       |
| M249  | PE02798 | Ba Angouré   | Korofane       |
| M246  | PE02799 | Zongo        | Korofane       |
| M324  | PE02795 | Guerguéra    | Korohane       |
| M325  | PE02796 | Ba Angouré   | Korohane       |
| M104  | PE02836 | Guéro        | Lido           |
| M101  | PE02838 | Darankoba    | Lido           |
| M100  | PE02839 | Zongo        | Lido           |
| M102  | PE02840 | Bazaoné      | Lido           |
| M275  | PE02685 | Dan Kazagui  | Madarounfa     |
| M277  | PE02683 | Zongo        | Madarounfa     |
| M279  | PE02684 | Zanfaroua    | Madarounfa     |
| M085  | PE02816 | Haïni Kiré   | Margou         |
| M086  | PE02817 | Somno        | Margou         |
| M308  | PE02712 | Zongo        | May Guizawa    |
| M306  | PE02713 | Ankoutess    | May Guizawa    |
| M420  | PE02715 | Zongo        | May Jirgui     |
| M397  | PE02628 | Gamogi       | Mirriah        |
| M208  | PE02783 | Guerguéra    | Mogheur        |
| M144  | PE02810 | Haïni Kiré   | Mokko          |
| M353  | PE02582 | Boudouma     | N'Garoua       |
| M354  | PE02583 | Guissiri     | N'Garoua       |
| M344  | PE02722 | Zongo        | Rwafin Wada    |
| M342  | PE02723 | Matan Hatchi | Rwafin Wada    |
| M400  | PE02660 | Ankoutess    | Sabon Kafi     |
| M402  | PE02661 | Ba Angouré   | Sabon Kafi     |
| M412S | PE02653 | Ba Angouré   | Sabongari      |
| M039  | PE02908 | Zongo        | Sanam          |
| M041  | PE02909 | Bazaoné      | Sanam          |
| M037  | PE02910 | Guerguéra    | Sanam          |
| M176  | PE02979 | Somno        | Saoura         |
| M387  | PE02617 | Ankoutess    | Sassoumbouroum |
| M370  | PE02598 | Bodendji     | Sisya          |
| M122  | PE02869 | Bakin Iri    | Soukougoutan   |
| M126  | PE02870 | Guerguéra    | Soukougoutan   |
| M124  | PE02868 | Zongo        | Soukougoutan   |
| M125  | PE02872 | Bazaoné      | Soukougoutan   |
| M225  | PE02748 | Guerguéra    | Tabalak        |
| M257  | PE02780 | Guerguéra    | Tajae          |

|      |         |            |           |
|------|---------|------------|-----------|
| M262 | PE02779 | Zongo      | Tajae     |
| M017 | PE02962 | Tchinguel  | Taka      |
| M014 | PE02964 | Gnieyo     | Taka      |
| M089 | PE02825 | Haini Kiré | Tanda     |
| M284 | PE02718 | Zongo      | Tchadoua  |
| M156 | PE02985 | Haini Kiré | Tchoudawa |
| M158 | PE02986 | Somno      | Tchoudawa |
| M417 | PE02610 | Ba Angouré | Tirmini   |
| M419 | PE02609 | Tamangagi  | Tirmini   |
| M033 | PE02901 | Dan Ayorou | Tounfalis |
| M034 | PE02903 | Bazaoné    | Tounfalis |
| M036 | PE02902 | Zongo      | Tounfalis |
| M199 | PE02777 | Guerguéra  | Tsernawa  |
| M198 | PE02776 | Zongo      | Tsernawa  |
| M377 | PE02625 | Gamogi     | Ouacha    |
| M003 | PE02971 | Kolala     | Wanzerbé  |
| M005 | PE02970 | Foulanya   | Wanzerbé  |
| M191 | PE02773 | Maewa      | Yaya      |

---

























---
